# Supplementary material for: Discovery of cobweb-like MoC6 and its application for nitrogen fixation
Source: Royal Society of Chemistry journal article supplement (doi:10.1039/c8ta03481h), 2018-01-01
Supplement: c8ta03481h1.pdf [file c8ta03481h1.pdf]

## Supporting Information

*for*

**Discovery of cobweb-like MoC<sub>6</sub> and its application for nitrogen fixation**

Z. W. Chen, X. Y. Lang, Q. Jiang\*

*Key Laboratory of Automobile Materials, Ministry of Education, and School of  
Materials Science and Engineering, Jilin University, Changchun 130022, China*

---

\* Correspondence and requests for materials should be addressed to Q.J. (e-mail: [jiangq@jlu.edu.cn](mailto:jiangq@jlu.edu.cn)).

## Calculation method

The spin-polarized DFT calculations with norm-conserving pseudopotentials as implemented in the CASTEP code are performed in this work.<sup>1, 2</sup> The exchange-correlation effects are described by the generalized gradient approximation (GGA) with Perdew-Burke-Ernzerhof functional (PBE).<sup>3</sup> The minimum energies for all structures are obtained until energy, maximum force, and maximum displacement have become less than  $1 \times 10^{-5}$  eV/atom, 0.03 eV/Å, and 0.001 Å, respectively. The calculations are carried out using plane-wave cutoff energy of 650 eV. To accurately describe the van der Waals interactions, the DFT-D method within the Grimme scheme is used in all calculations for dispersion corrections.<sup>4</sup> Concerning with the properties of charge transfers, atom charges would be calculated via the Mulliken population analysis.<sup>5</sup> For transition states (TS) searching, the calculation first performed a linear synchronous transit (LST) maximum, which is followed by an energy minimization in directions conjugating to the reaction pathway.<sup>6</sup> The TS approximation obtained via LST/optimization is then used to perform a quadratic synchronous transit (QST) maximization to find more accurate transitional states. The  $\sqrt{3} \times \sqrt{3}$  supercell of MoC<sub>6</sub> is used for evaluating the stability and the catalytic activity. The corresponding k-point sampling of the Brillouin zone is set as  $3 \times 3 \times 1$  grid. To match the lattices between MoC<sub>6</sub> and Cu(111), we apply  $2 \times 2$  supercell of MoC<sub>6</sub> and  $5 \times 5$  supercell of Cu(111) for designing the synthetic route.

The cohesive energy value  $E_b$  is defined as  $E_b = (E_{\text{MoC}_6} - 2E_{\text{Mo}} - 12E_C)/14$ , where  $E_{\text{MoC}_6}$ ,  $E_{\text{Mo}}$  and  $E_C$  are the total energies of MoC<sub>6</sub> unit cell, the free Mo atom and the

free C atom, respectively. The adsorption energy values of  $\Delta E_{M^*}$  are determined by  $\Delta E_{M^*} = (E_{M^*} - E_{\text{sub}} - nE_M)/n$ , where  $E_{M^*}$ ,  $E_{\text{sub}}$  and  $E_M$  are the total energies of the adsorbed system, the isolate substrate and the adsorbates, respectively. Moreover, free energies of the NRR intermediates are calculated based on a computational hydrogen electrode (CHE) model suggested by Nørskov et al.<sup>7</sup> Free energy change ( $\Delta G$ ) is determined by  $\Delta G(U) = \Delta E + \Delta ZPE - T\Delta S - neU$  at pH = 0, where  $\Delta E$  is the reaction energy,  $\Delta ZPE$  is the zero point energy,  $T$  is temperature,  $\Delta S$  is the change in the entropy,  $n$  is the number of electrons and  $U$  is the applied potential involved in the reaction.

**Figure S1.** Atomic configuration of a bare  $2 \times 2$  GY sheet, for which  $sp$ - and  $sp^2$ -hybridized C atoms coexist. The grey balls represent the C atoms. The primitive cell of the GY sheet is enclosed by the dashed lines.

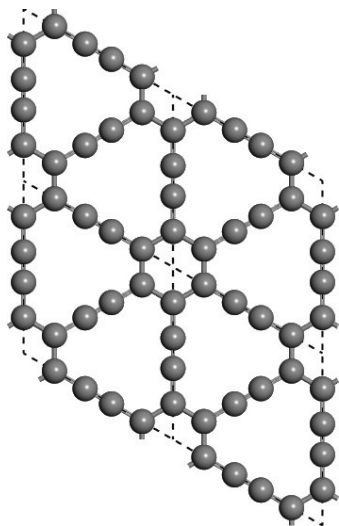

**Figure S2.** Both side and top views of the  $N_2$  adsorption on the bridge and top site of  $MoC_6$ . The blue and dark blue balls represent Mo and N atoms.

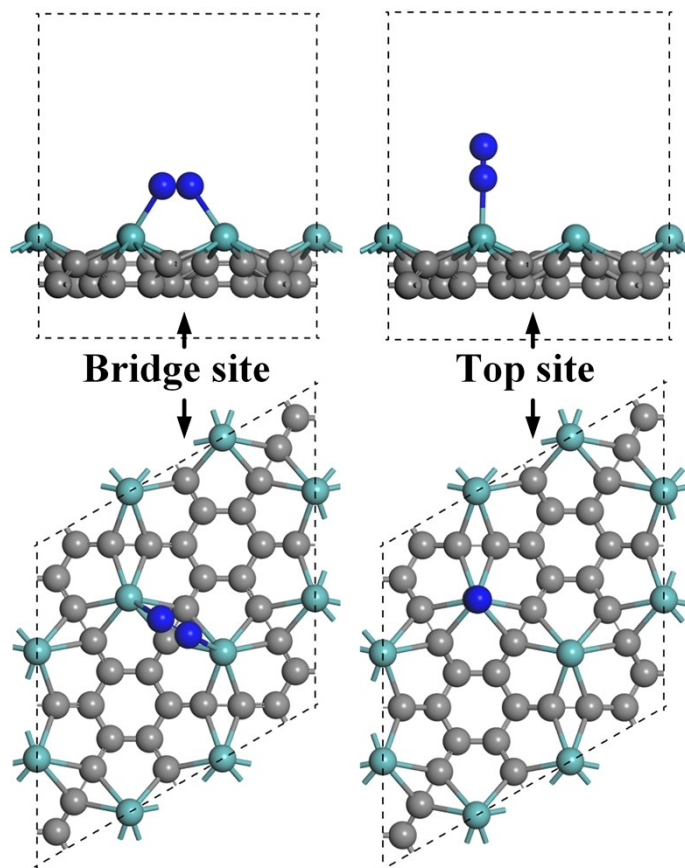

**Figure S3.** The reaction path of N-N bond breakage for the intermediate state of  $N_2^*$ .

TS indicates the corresponding transition state.

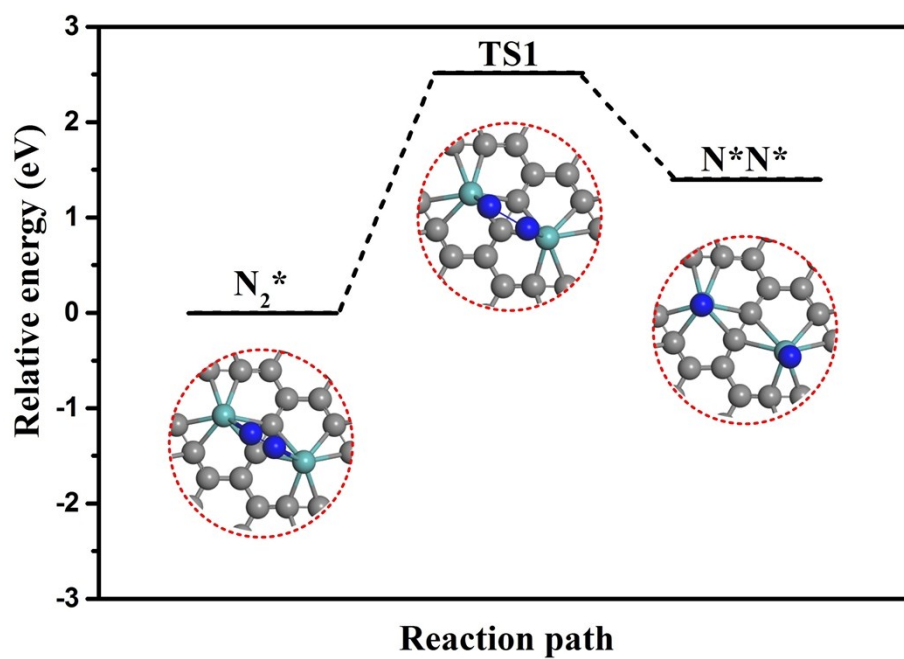

**Figure S4.** The reaction path of N-N bond breakage for the intermediate state of  $NNH^*$ .

The white balls represent H atoms.

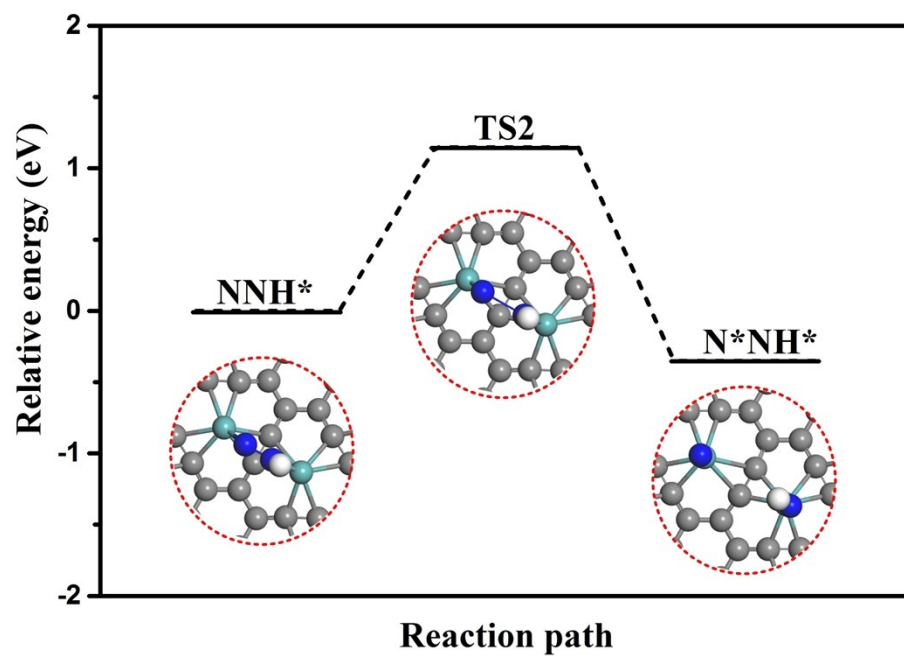

**Figure S5.** The reaction path of N-N bond breakage for the intermediate state of  $\text{NHNH}^*$ .

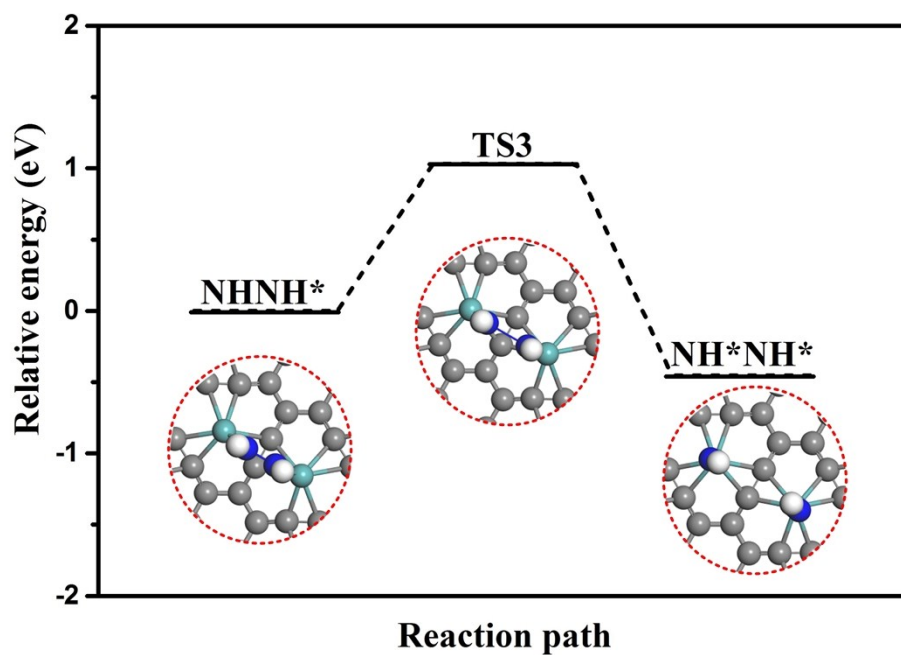

**Figure S6.** The reaction path of N-N bond breakage for the intermediate state of  $\text{NHNH}_2^*$ .

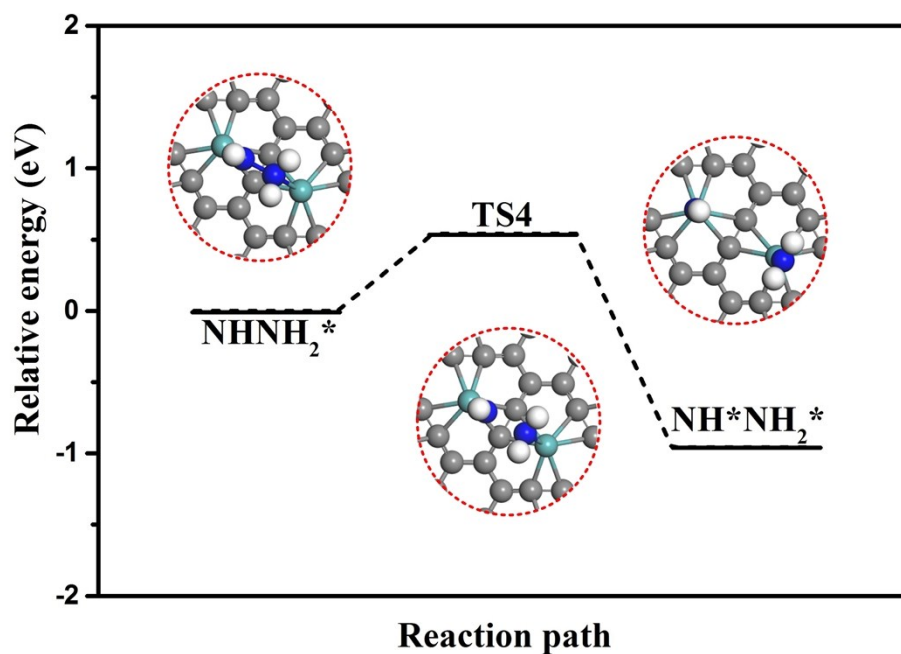

**Figure S7.** The reaction path of N-N bond breakage for the intermediate state of  $\text{NH}_2\text{NH}_2^*$ .

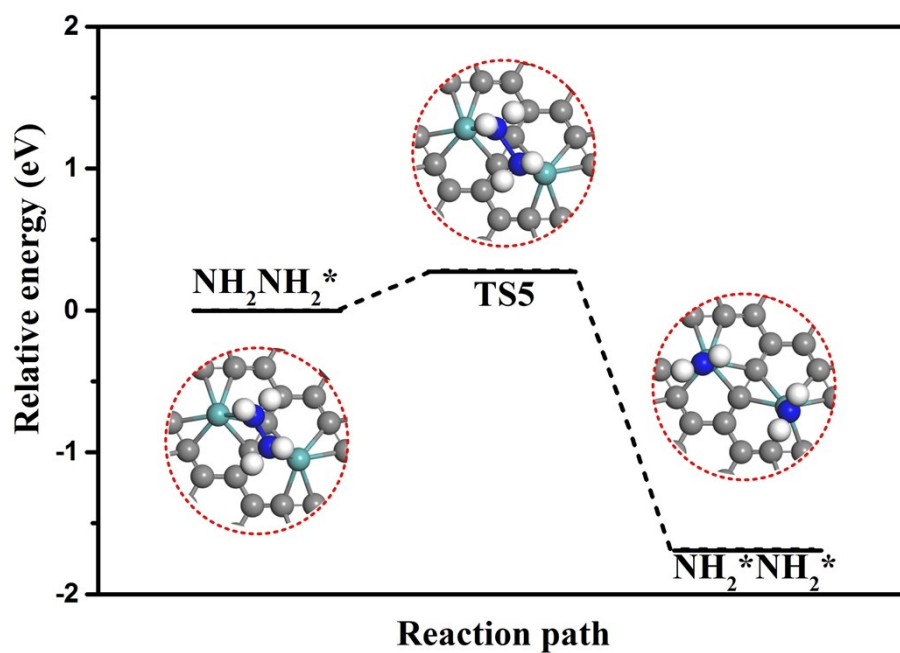

**Figure S8.** The distal mechanism for nitrogen reduction reaction (NRR) on  $\text{MoC}_6$ . The free energy profiles and the structures of intermediates are shown in the reaction path.

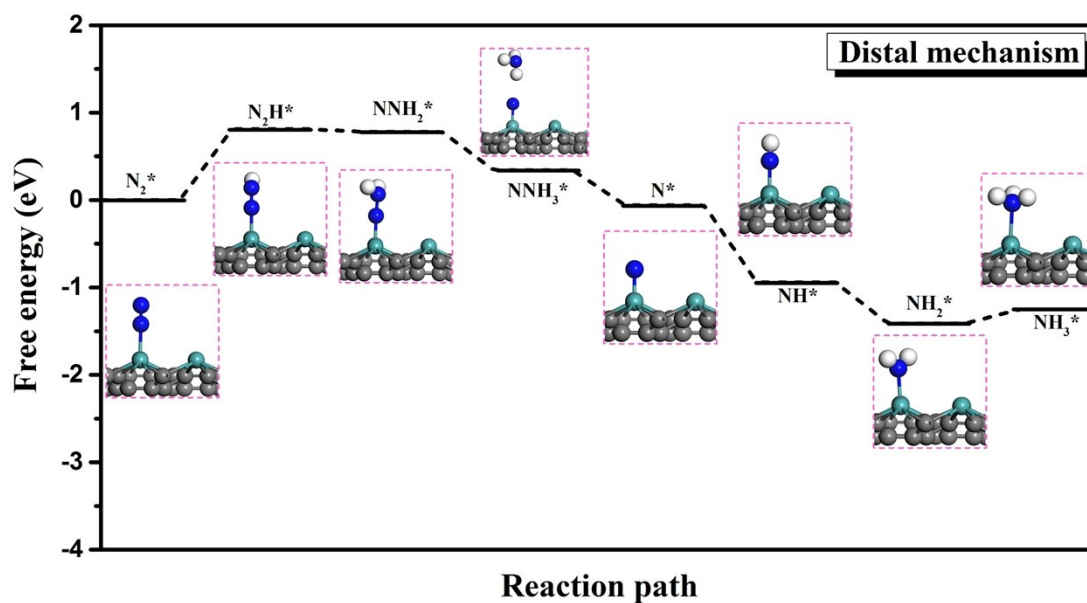

**Figure S9.** The alternating mechanism for nitrogen reduction reaction (NRR) on MoC<sub>6</sub>. The free energy profiles and the structures of intermediates are shown in the reaction path.

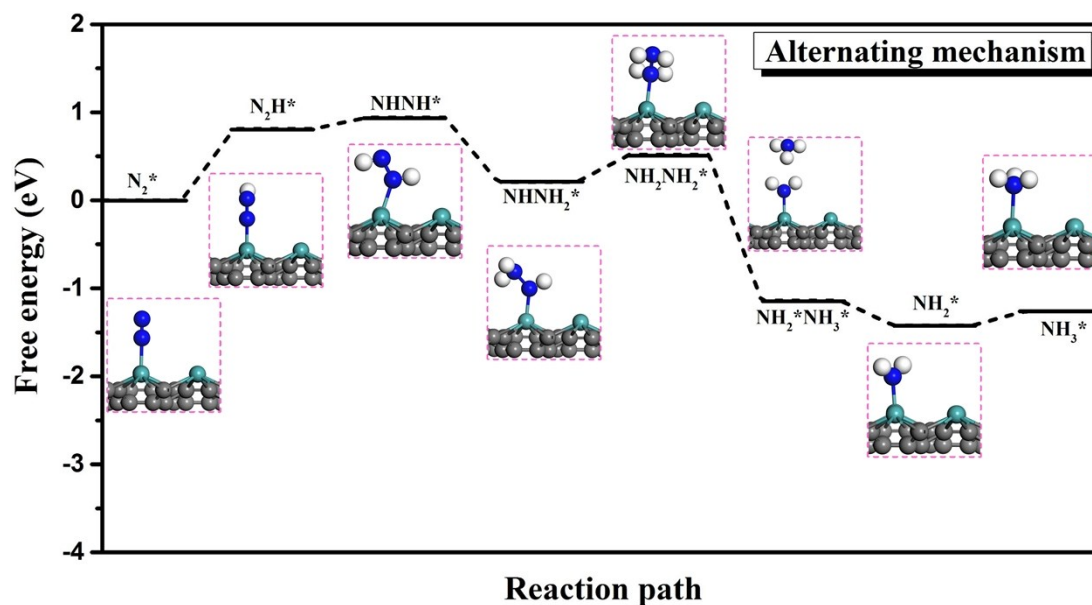

## References

1. M. D. Segall, Philip J. D. Lindan, M. J. Probert, C. J. Pickard, P. J. Hasnip, S. J. Clark and M. C. Payne, *J. Phys. Condens. Matter.*, 2002, **14**, 2717-2744.
2. D. R. Hamann, M. Schlüter and C. Chiang, *Phys. Rev. Lett.*, 1979, **43**, 1494-1497.
3. J. P. Perdew, K. Burke and M. Ernzerhof, *Phys. Rev. Lett.*, 1996, **77**, 3865-3868.
4. S. Grimme, *J. Comput. Chem.*, 2006, **27**, 1787-1799.
5. M. D. Segall, R. Shah, C. J. Pickard and M. C. Payne, *Phys. Rev. B*, 1996, **54**, 16314-16317
6. T. A. Halgren and W. N. Lipscomb, *Chem. Phys. Lett.*, 1977, **49**, 225-232.
7. E. Skulason, T. Bligaard, S. Gudmundsdottir, F. Studt, J. Rossmeisl, F. Abild-Pedersen, T. Vegge, H. Jonsson and J. K. Nørskov, *Phys. Chem. Chem. Phys.*, 2012, **14**, 1235-1245.
